# Supplementary material
Source: Springer Nature journal article supplement (https://www.springermedizin.de/resource/supplementary/13049_2013_796_MOESM3_ESM.pdf/9667234)

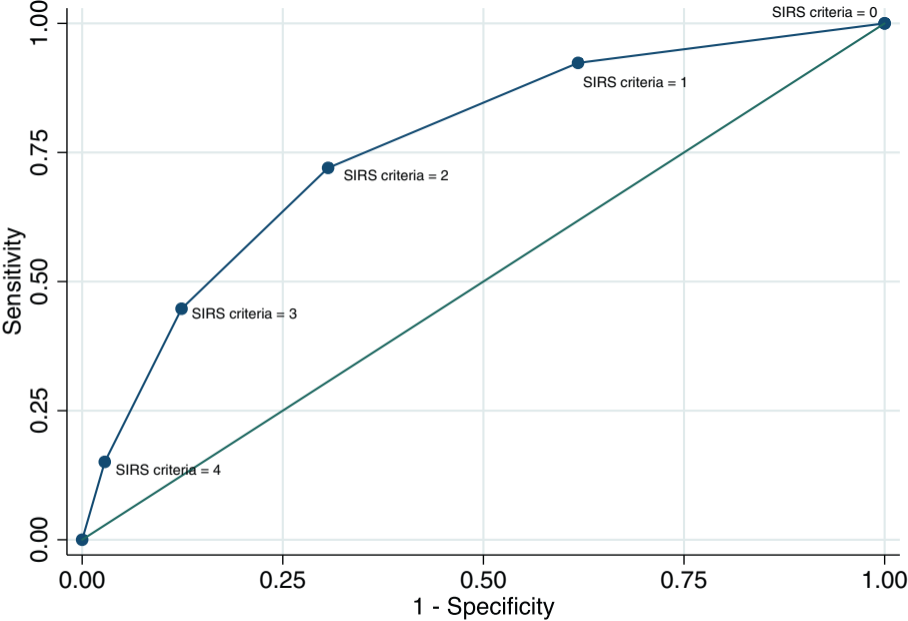

Area under ROC curve = 0.7607

Supplement: MOESM3 [file 9667234]
